# Supplementary material for: Advanced Steam Reforming of Bio-Oil with Carbon Capture: A Techno-Economic and CO2 Emissions Analysis
Source: MDPI journal article supplement (doi:10.3390/cleantechnol4020018), 2022-04-26
Supplement: s1 [file s1]

Archive with 1 entries (1 files):
- cleantechnol-1655421-supplementary.pdf
